# Supplementary material
Source: publisher site journal article supplement (https://www.dovepress.com/article/206053)
Supplement: Supplementary file 1 [file get_supplementary_file.php]

Supplementary Table 1. Types of gene mutations associated with FPLD.

| **GENE** | ***PPARγ*** | ***LMNA*** | ***LMNA*** | ***ZMPSTE24*** | ***AKT2*** | ***PIK3R1*** | ***CIDEC*** | ***PLIN1*** | ***LIPE*** | ***ADRA2A*** | ***CAV1*** | ***PCYT1A*** | ***PSMB8*** | ***WRN*** | ***POLD1*** | ***BLM*** |
| --- | --- | --- | --- | --- | --- | --- | --- | --- | --- | --- | --- | --- | --- | --- | --- | --- |
| **PHENOTYPE** | **FPLD3** | **FPLD2** | **MADA** | **MADB** | **a** | **SHORT** | **FPLD5** | **FPLD4** | **FPLD6** | **a** | **a** | **a** | **CANDLE** | **WERNER** | **MDPL** | **BLOOM** |
| **MUTATIONS** |  |  |  |  |  |  |  |  |  |  |  |  |  |  |  |  |
| Missense/  Nonsense | 17 | 24 | 6 | 8 | 1 | 5 | 1 |  | 1 | 1 | 1 | 10 | 9 | 28 | 3 | 36 |
| Small deletions |  |  |  | 1 |  | 3 |  | 2 | 1 |  | 3 | 3 |  | 26 | 1 | 19 |
| Small insertions |  |  |  | 1 |  | 3 |  | 1 | 1 |  |  | 1 |  | 5 |  | 8 |
| Splicing |  | 1 |  | 1 |  |  |  | 1 |  |  |  |  |  | 26 |  | 12 |
| Regulatory | 1 |  |  |  |  |  |  |  |  |  |  |  |  |  |  |  |
| Small indels |  |  |  |  |  |  |  |  |  |  |  |  |  | 2 |  | 1 |
| Gross deletions | 2 |  |  |  |  |  |  |  |  |  |  |  |  | 4 |  | 5 |
| Gross insertions |  |  |  |  |  |  |  |  |  |  |  |  |  | 2 |  |  |
| **Total** | 20 | 25 | 6 | 11 | 1 | 11 | 1 | 4 | 3 | 1 | 4 | 14 | 9 | 93 | 4 | 81 |

**a** Partial lipodystrophy phenotype (see text for further details)

Data obtained from the Human Gene Mutation Database (HGMD).70
